# Supplementary material for: Rationally designed two-photon absorption compounds based on benzoxazole derivatives: structure–property relationships and bio-imaging applications
Source: Royal Society of Chemistry journal article supplement (doi:10.1039/c6tb00201c), 2016-01-01
Supplement: c6tb00201c1.pdf [file c6tb00201c1.pdf]

## Supporting information

Xinping Ge<sup>a,ξ</sup>, Xiaoping Gan<sup>a,b,ξ</sup>, Shun Yao<sup>a</sup>, Kang Wang<sup>a</sup>, Weiju Zhu<sup>a</sup>, Jianhua Yu<sup>a</sup>,  
Jieying Wu<sup>a</sup>, Yupeng Tian<sup>a</sup>, Hongping Zhou<sup>a\*</sup>

<sup>a</sup>College of Chemistry and Chemical Engineering, Anhui University and Key Laboratory of  
Functional Inorganic Materials Chemistry of Anhui Province, 230601, Hefei, P.R. China

<sup>b</sup>Department of Applied Chemistry, School of Science, Anhui Agricultural University, 230036  
Hefei, P. R. China.

Corresponding author. Fax: +86-551-63861279; Tel: +86-551-63861279

E-mail address: [zhpzhp@263.net](mailto:zhpzhp@263.net)

ξ: These authors contributed equally to this work and should be considered co-first authors

**Figure S1a:** <sup>1</sup>H NMR, <sup>13</sup>C NMR and MS spectra of **M1**.

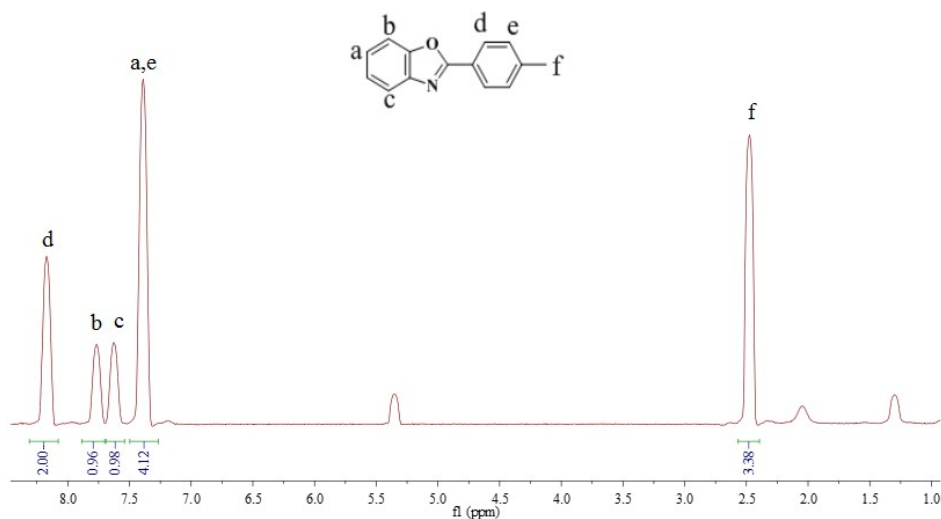

The <sup>1</sup>H NMR (400MHz) spectra of the **M1** in CD<sub>2</sub>Cl<sub>2</sub>

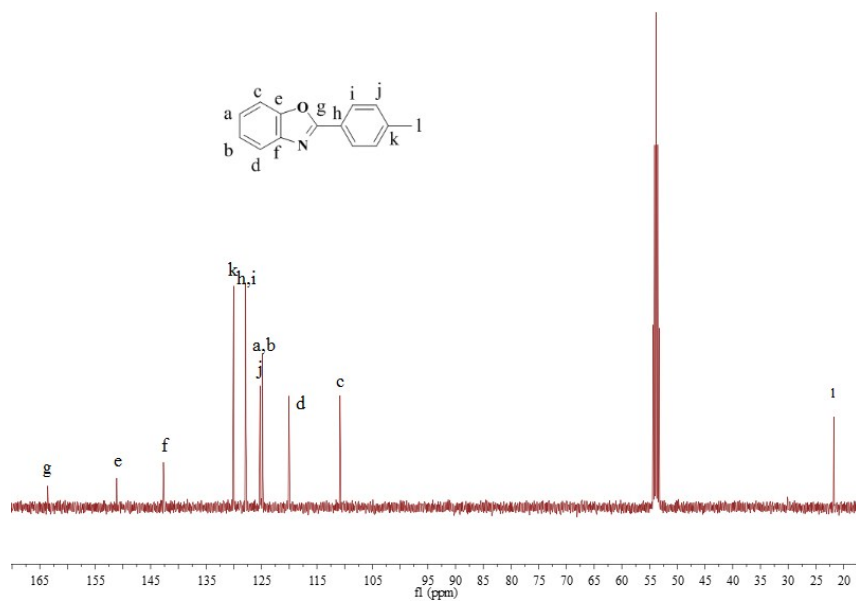

The  $^{13}\text{C}$  NMR (100 MHz) spectra of the **M1** in  $\text{CD}_2\text{Cl}_2$

log1 #22 RT: 0.21 AV: 1 NL: 1.32E7  
T: FTMS + c ESI Full ms [50.00-800.00]

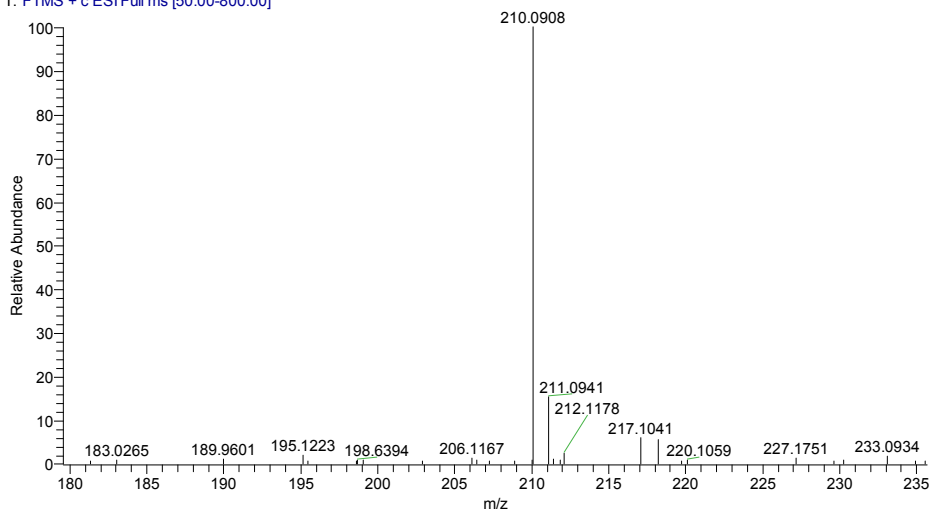

ESI MS of **M1**

**Figure S1b:**  $^1\text{H}$  NMR,  $^{13}\text{C}$  NMR and MS spectra of **M2**.

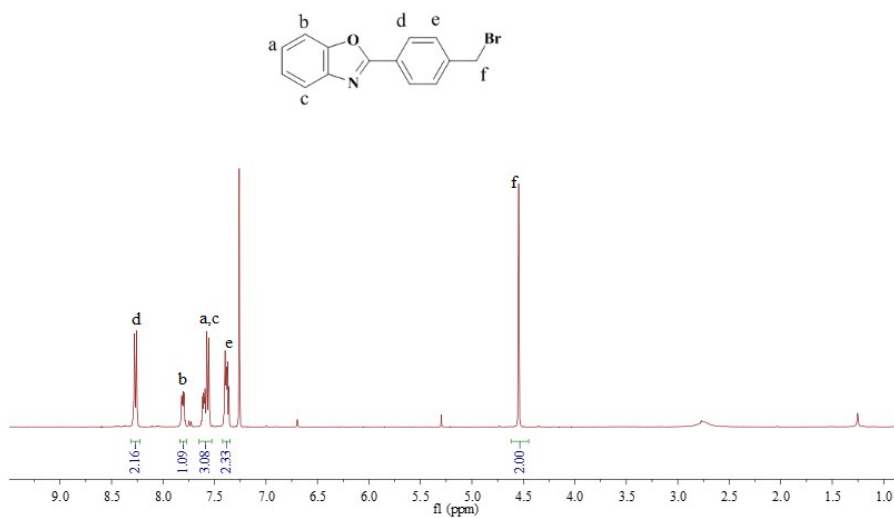

The  $^1\text{H}$  NMR (400MHz) spectra of the **M2** in  $\text{CDCl}_3$

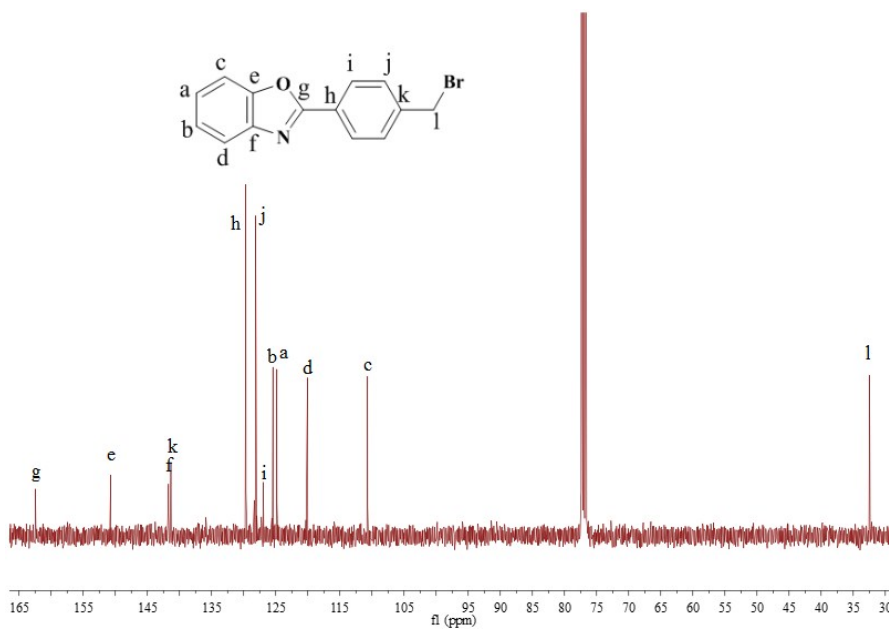

The  $^{13}\text{C}$  NMR (100 MHz) spectra of the **M2** in  $\text{CDCl}_3$

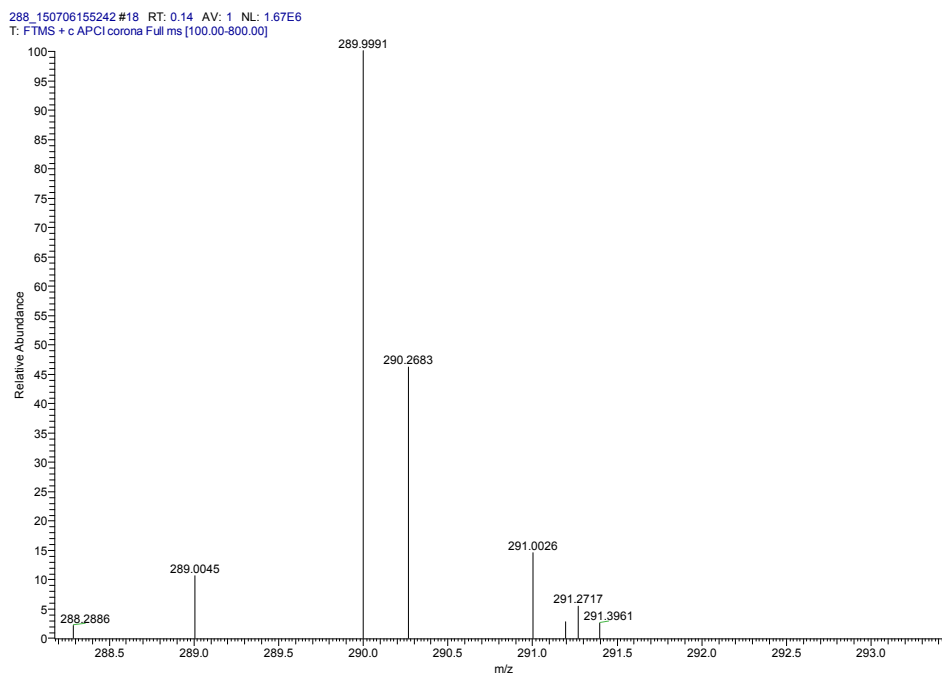

APCI MS of **M2**

**Figure S1c:**  $^1\text{H}$  NMR,  $^{13}\text{C}$  NMR and MS spectra of **M3**.

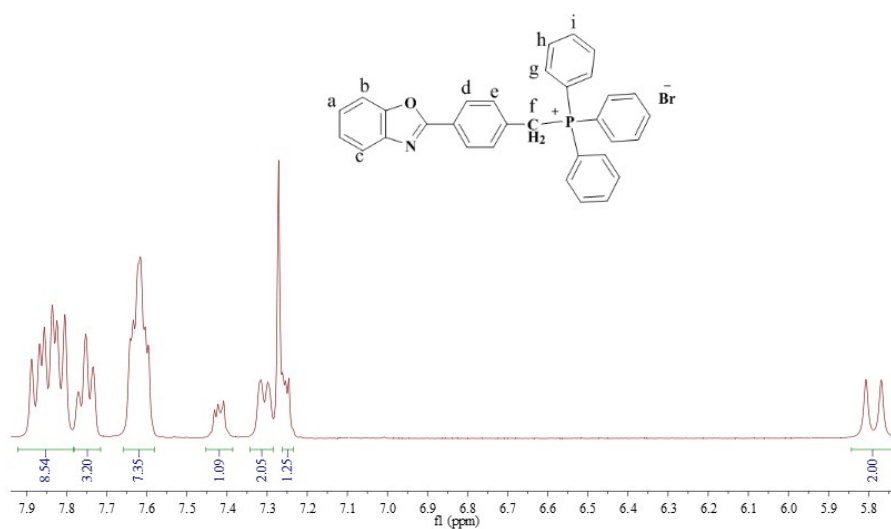

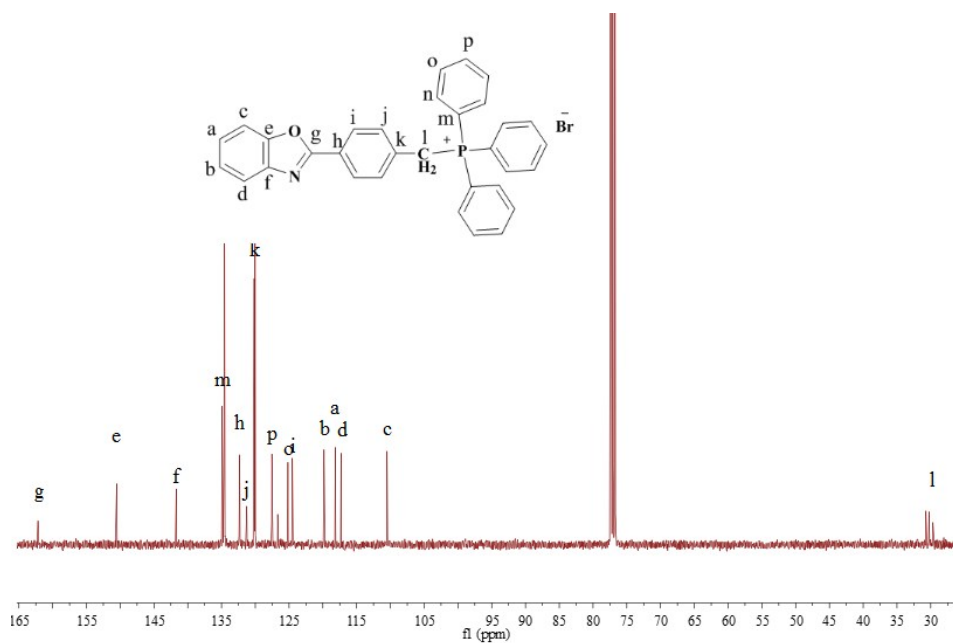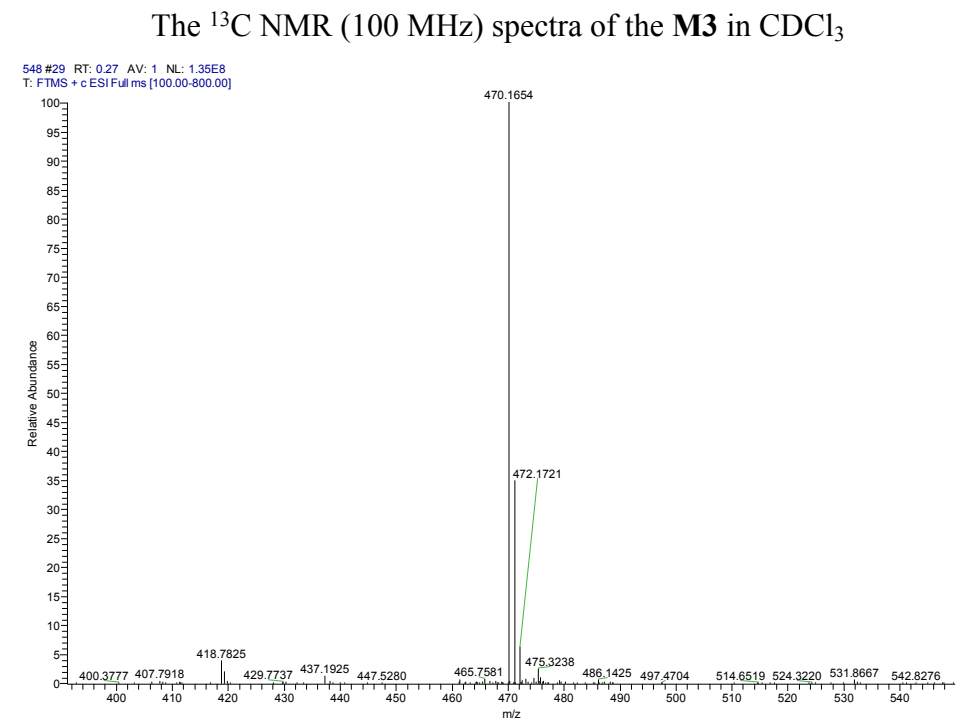

**Figure S1d:**  $^1\text{H}$  NMR,  $^{13}\text{C}$  NMR and MS spectra of **T1**.

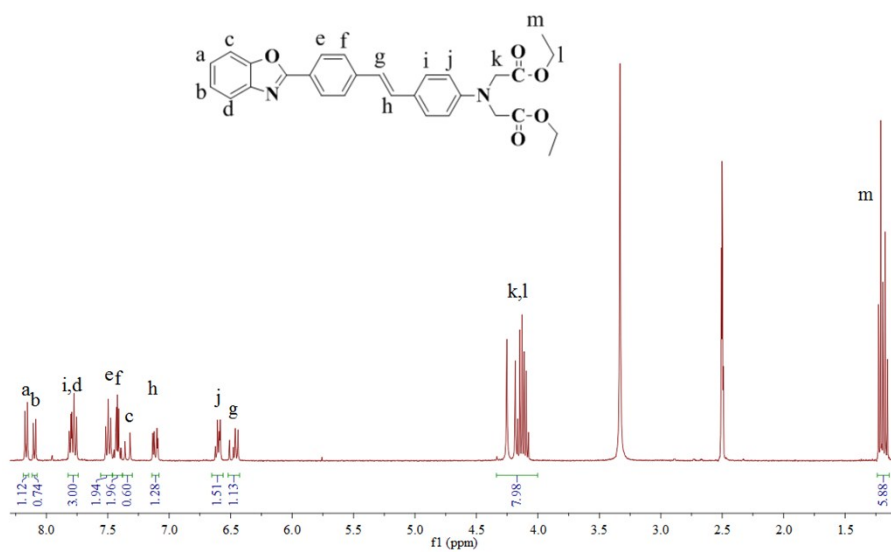

The  $^1\text{H}$  NMR (400MHz) spectra of the **T1** in  $\text{DMSO-}d_6$

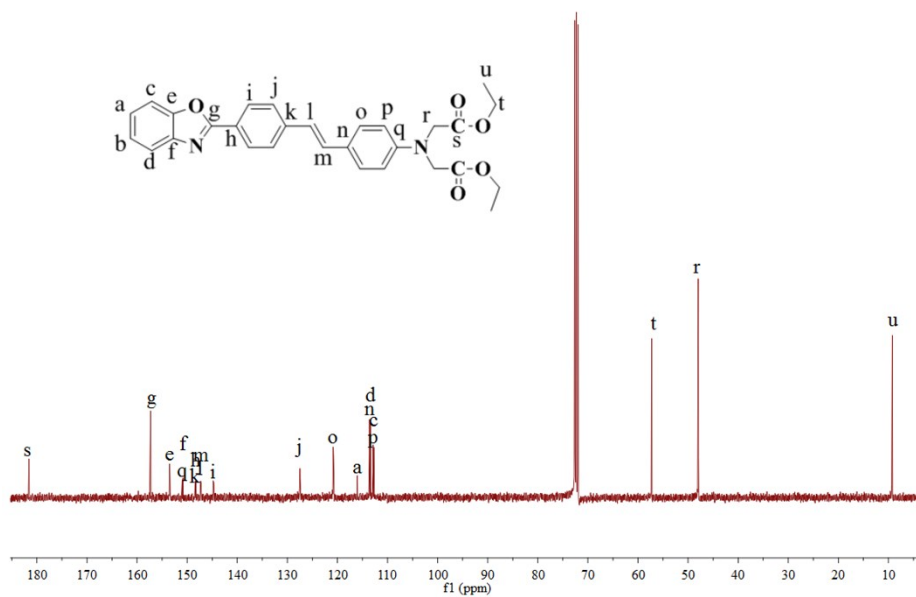

The  $^{13}\text{C}$  NMR (100 MHz) spectra of the **T1** in  $\text{DMSO-}d_6$

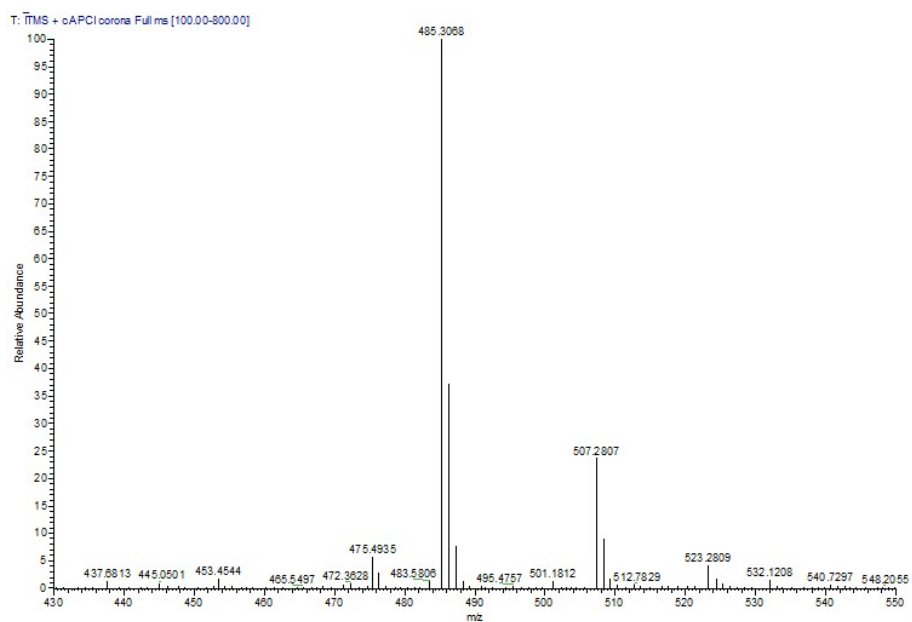

APCI MS of T1

Figure S1e:  $^1\text{H}$  NMR,  $^{13}\text{C}$  NMR and MS spectra of T2.

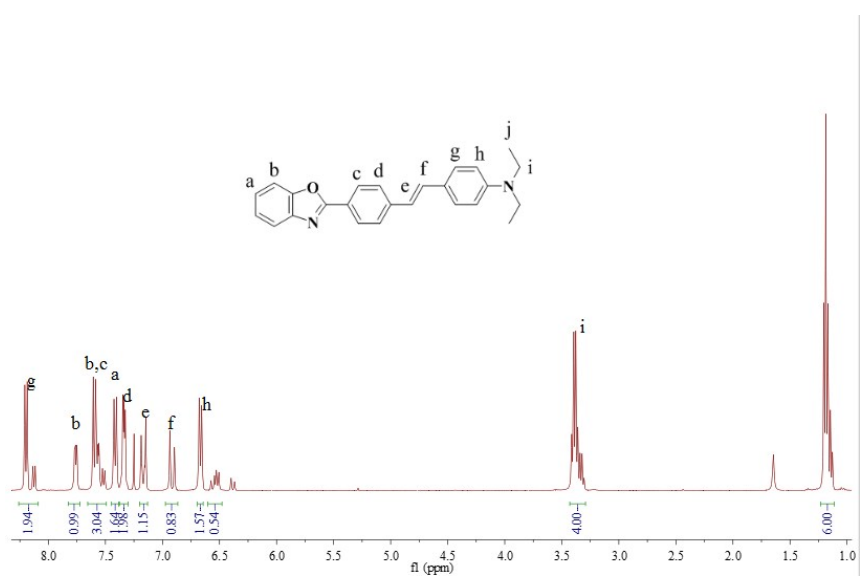

The  $^1\text{H}$  NMR (400MHz) spectra of the T2 in  $\text{CDCl}_3$

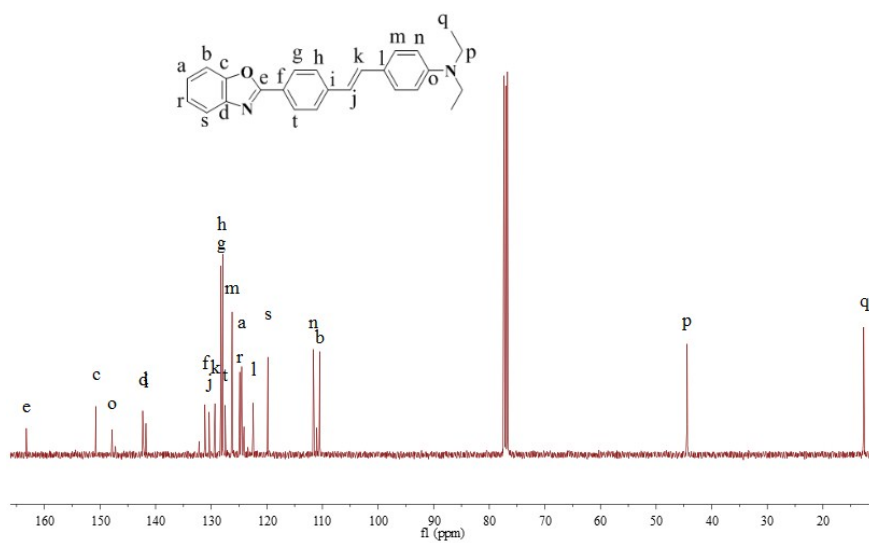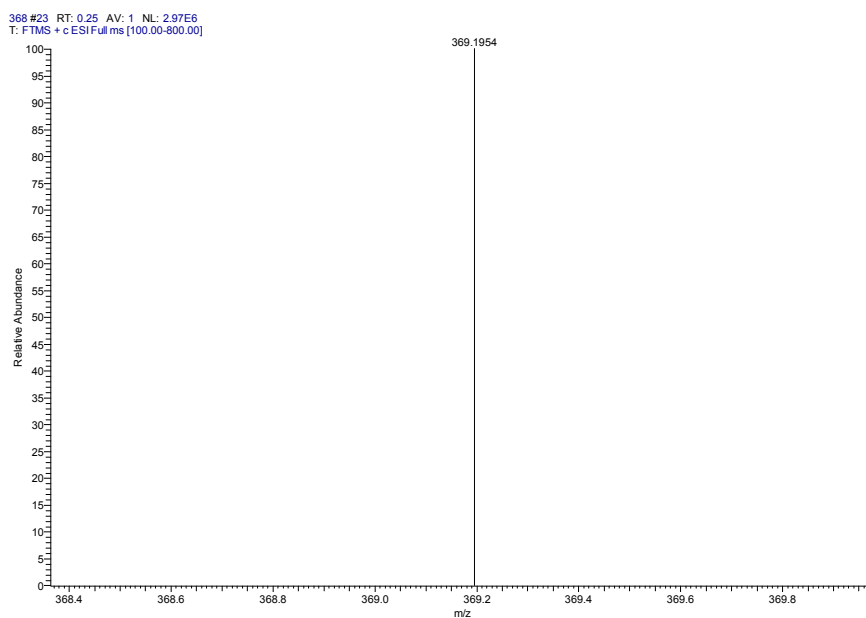

**Figure S1f**  $^1\text{H}$  NMR,  $^{13}\text{C}$  NMR and MS spectra of **T3**.



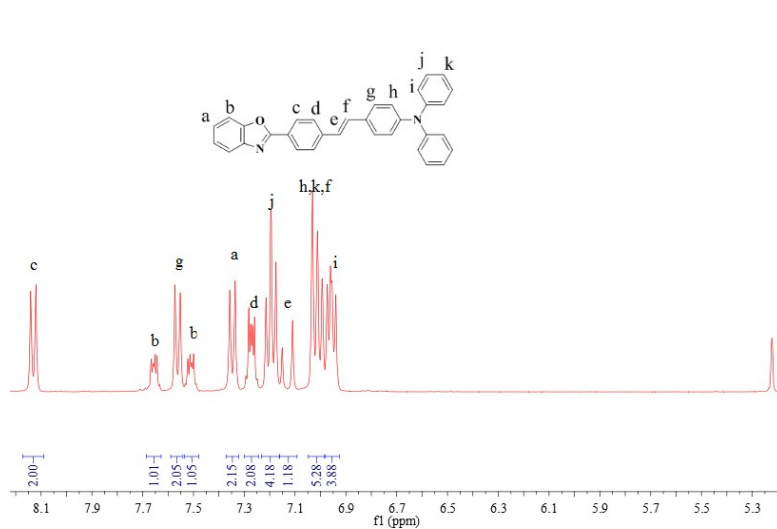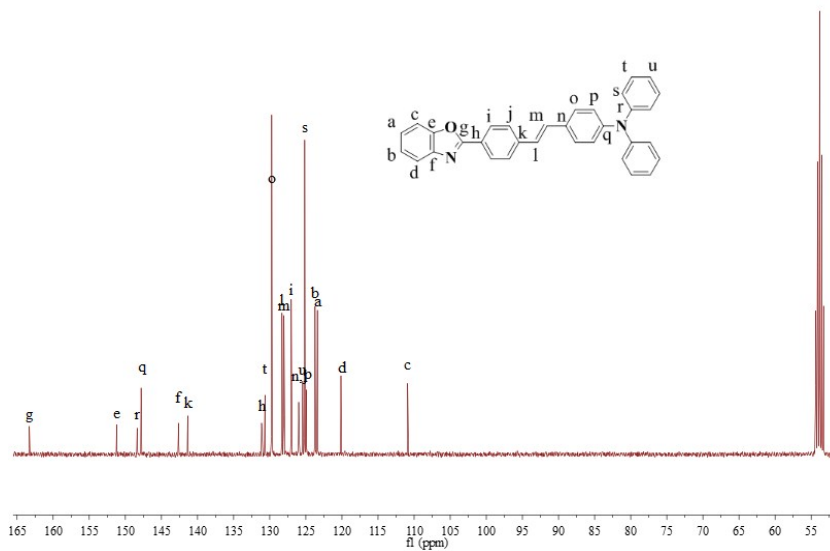

464\_150706155012 #16 RT: 0.13 AV: 1 NL: 8.88E6  
T: FTMS + c APCI corona Full ms [100.00-800.00]

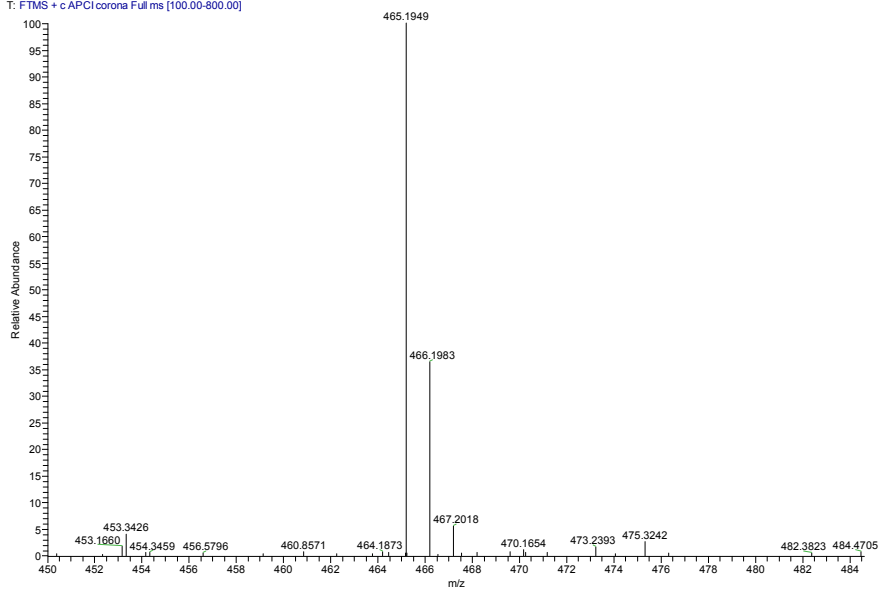

## APCI MS of T3

Figure S1g:  $^1\text{H}$  NMR,  $^{13}\text{C}$  NMR and MS spectra of T4.

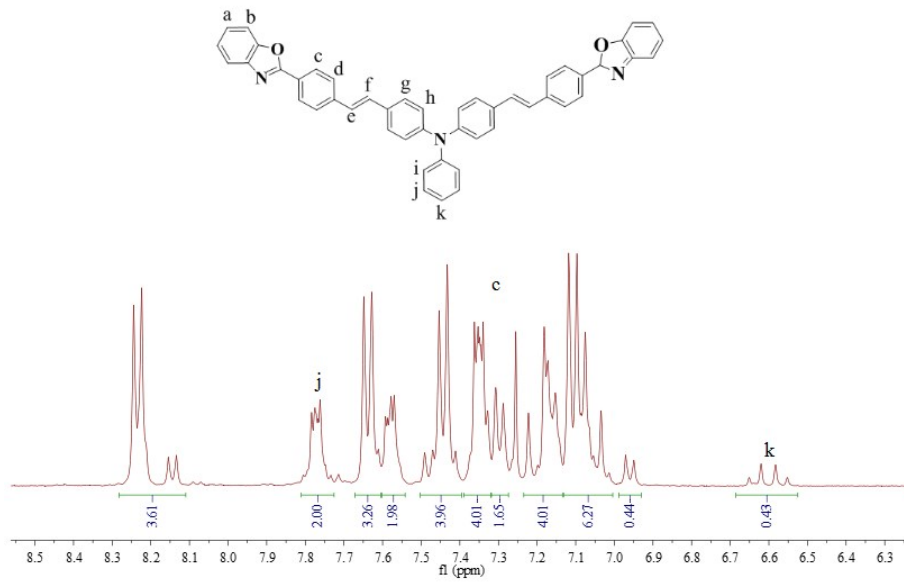

The  $^1\text{H}$  NMR (400 MHz) spectra of the T4 in  $\text{CDCl}_3$

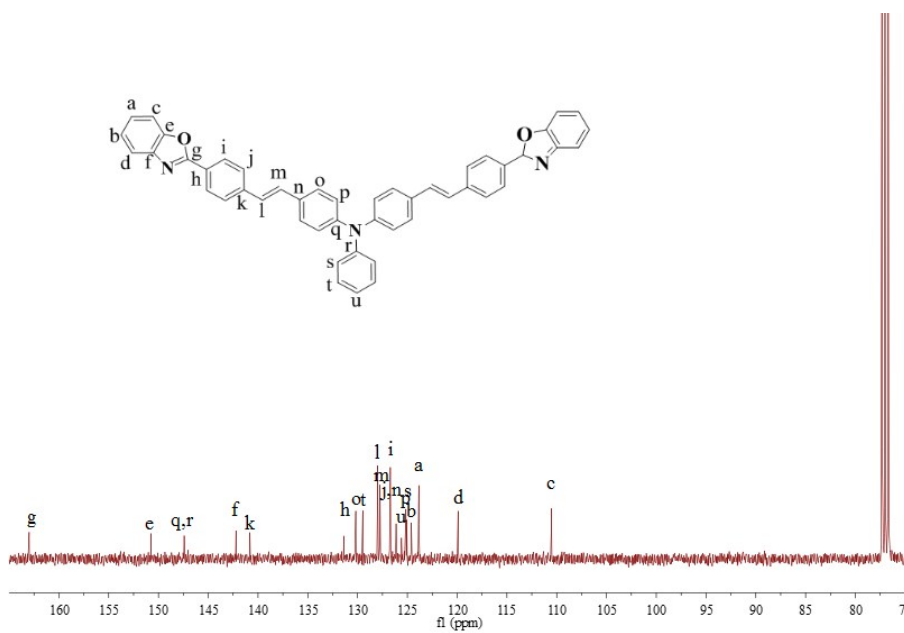

The  $^{13}\text{C}$  NMR (100 MHz) spectra of the T4 in  $\text{CDCl}_3$

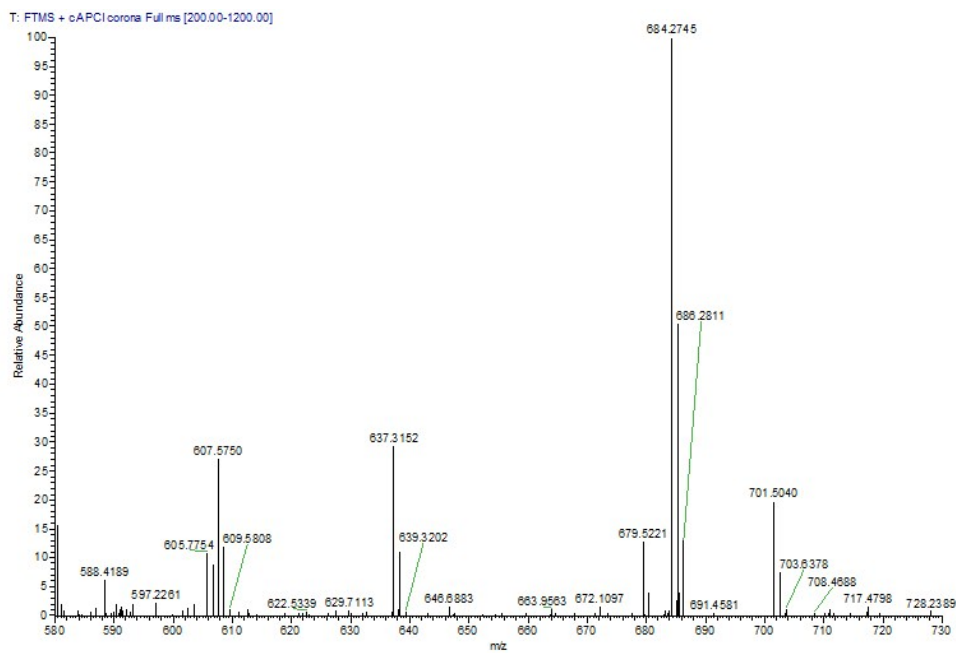

APCI MS of T4

Figure S1h:  $^1\text{H}$  NMR,  $^{13}\text{C}$  NMR and MS spectra of T5.

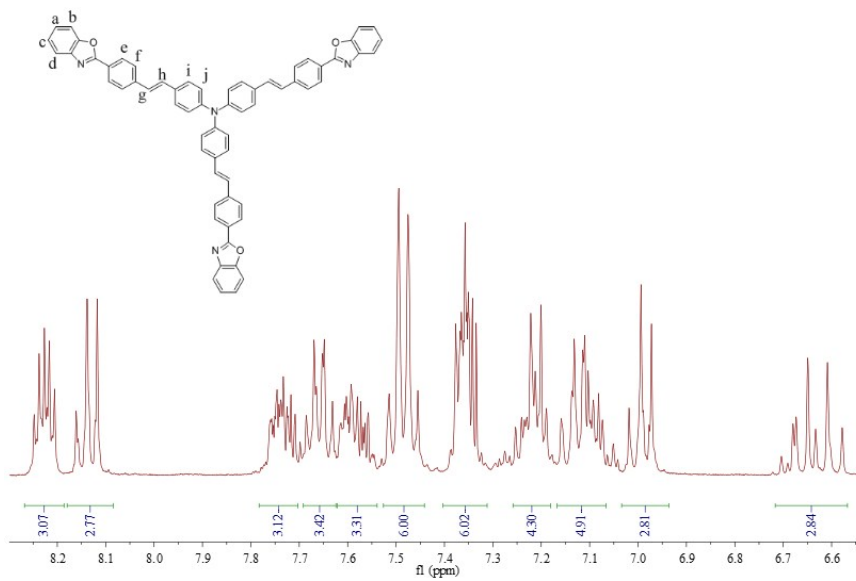

The  $^1\text{H}$  NMR (400MHz) spectra of the T5 in  $\text{CD}_2\text{Cl}_2$

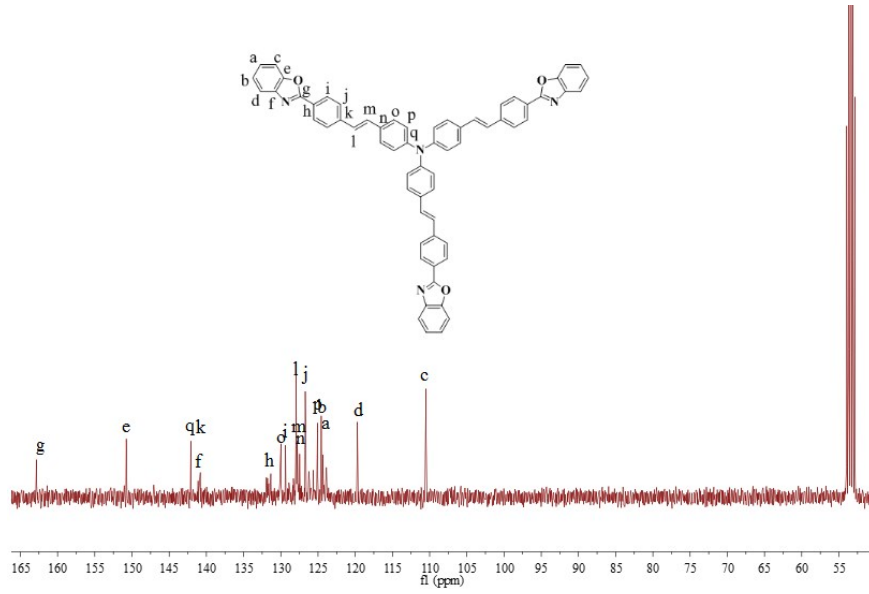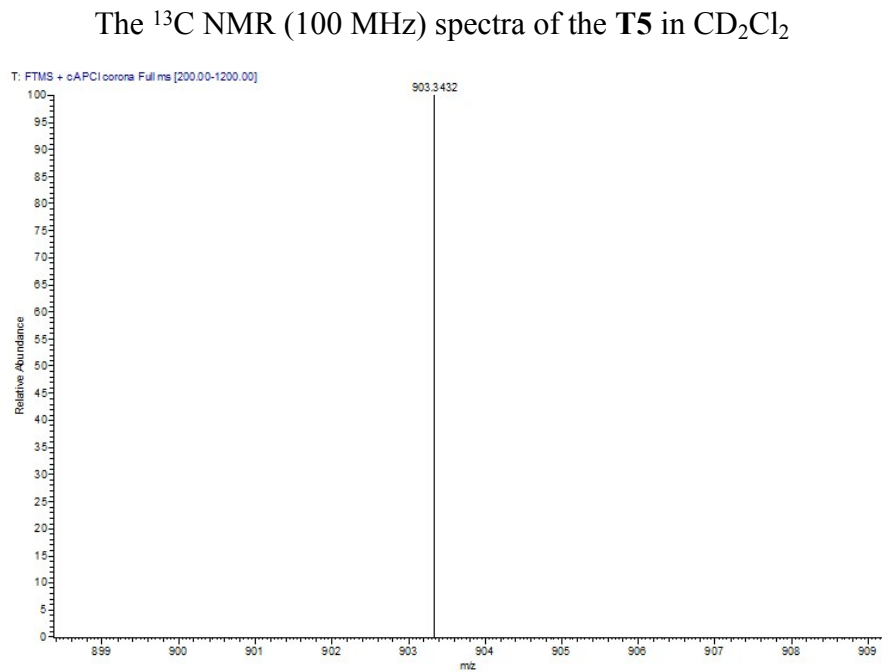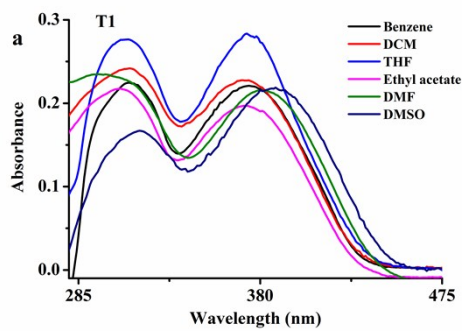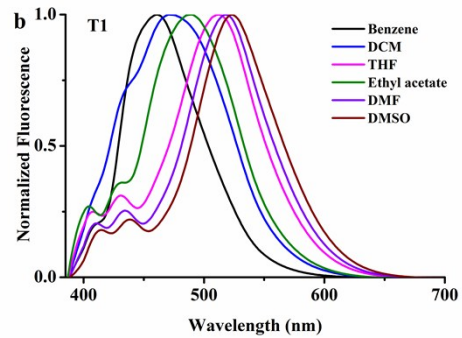

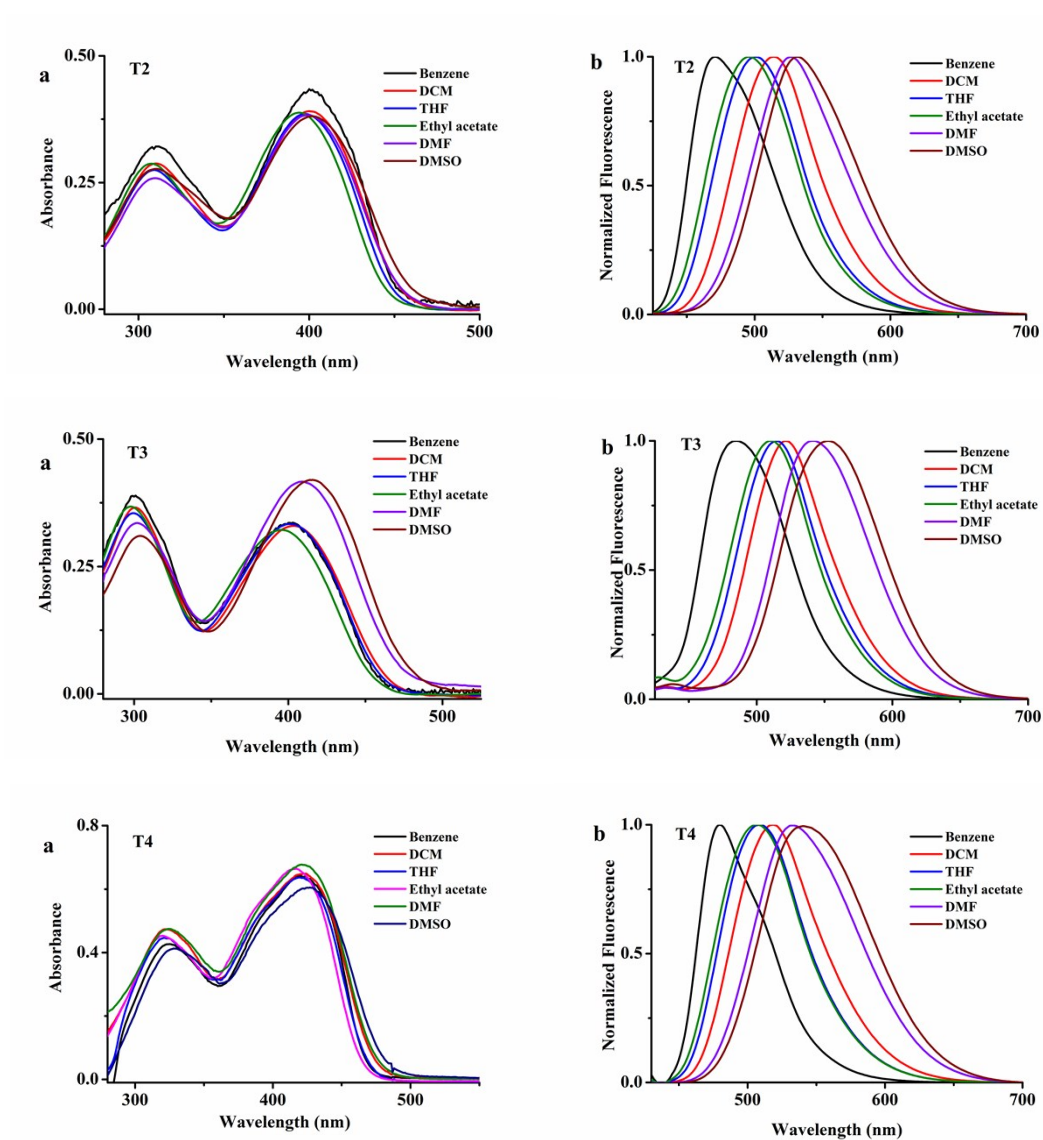

**Fig. S2.** (a) Linear absorption spectra of **T1-4** in different organic solvents; (b) Normalized one photon fluorescence spectra of **T1-4** in different organic solvents.

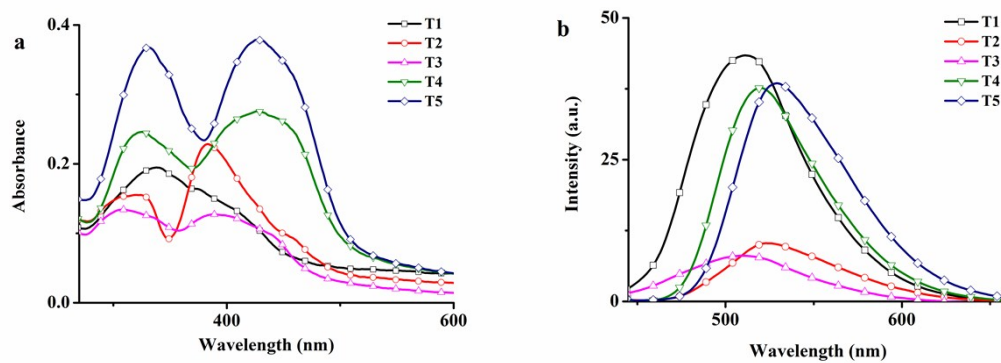

**Fig. S3.** (a)-(b) OPA and OPEF spectra of **T1-5** in aqueous solution ( $c = 1.0 \times 10^{-5}$  mol/L).

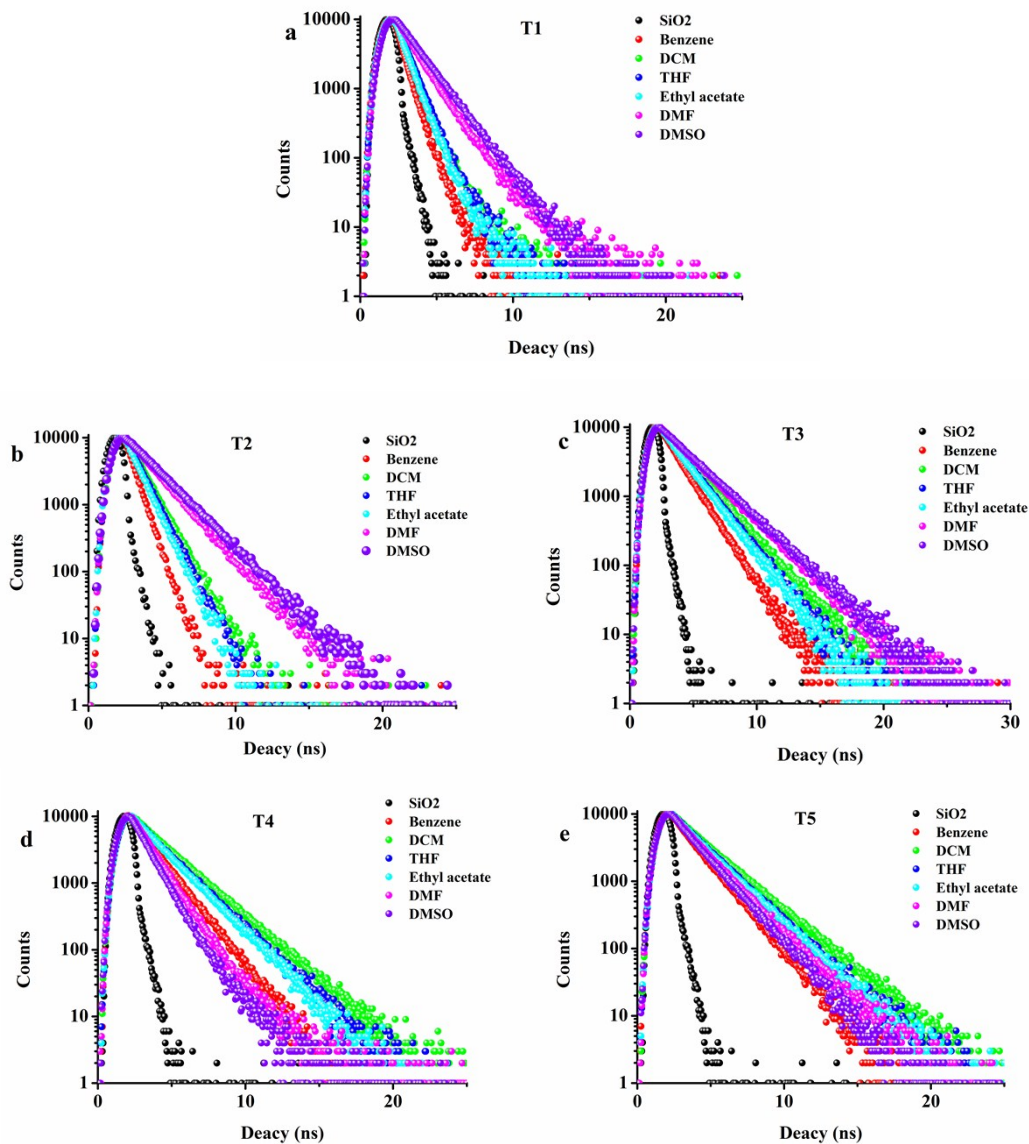

Fig. S4. (a)-(e) Fluorescence lifetime of T1-5 in different solvents.

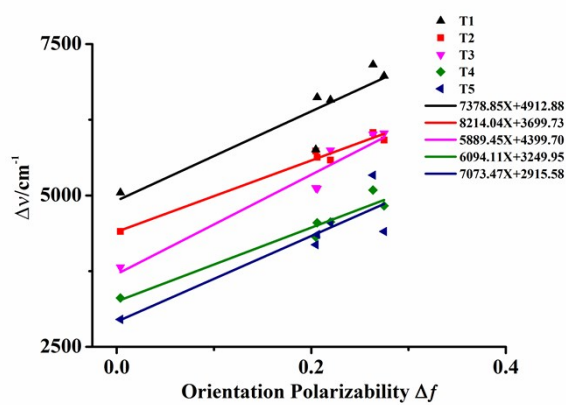

Figure S5. Lippert-Mataga plots for T1-5.



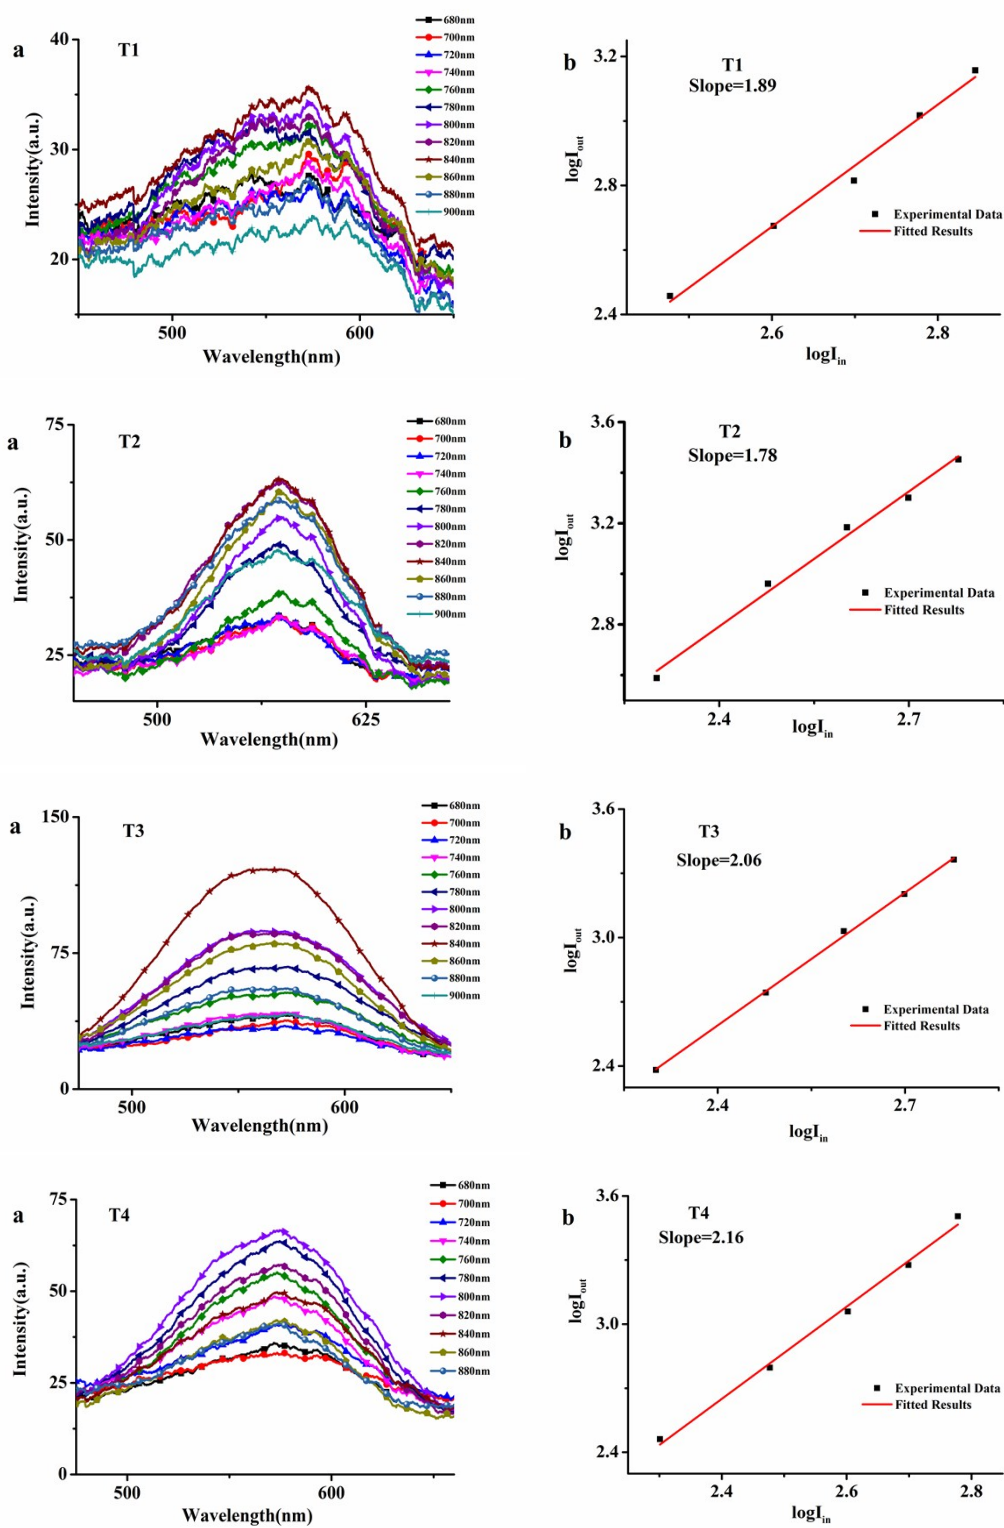

**Figure S6.** (a) The TPEF spectra of **T1-4** in DMF (500 mW,  $c = 5 \times 10^{-4}$  mol L<sup>-1</sup>); (b) Output fluorescence ( $I_{out}$ ) versus the square of input laser power ( $I_{in}$ ) for **T1-4** in DMF.

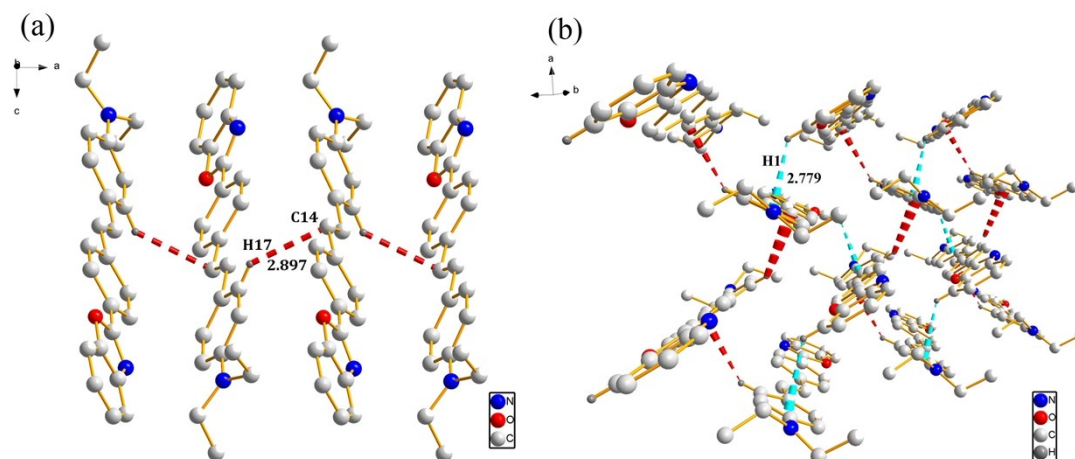

**Figure S7.** (a) One-dimensional structure of **T2** showing the C-H... $\pi$  (red) along the a-axis; (b) Three-dimensional structure of **T2** showing the C-H... $\pi$  stacking (blue-green) along the b-axis. Hydrogen atoms except H1 and H17 are omitted for clarity.

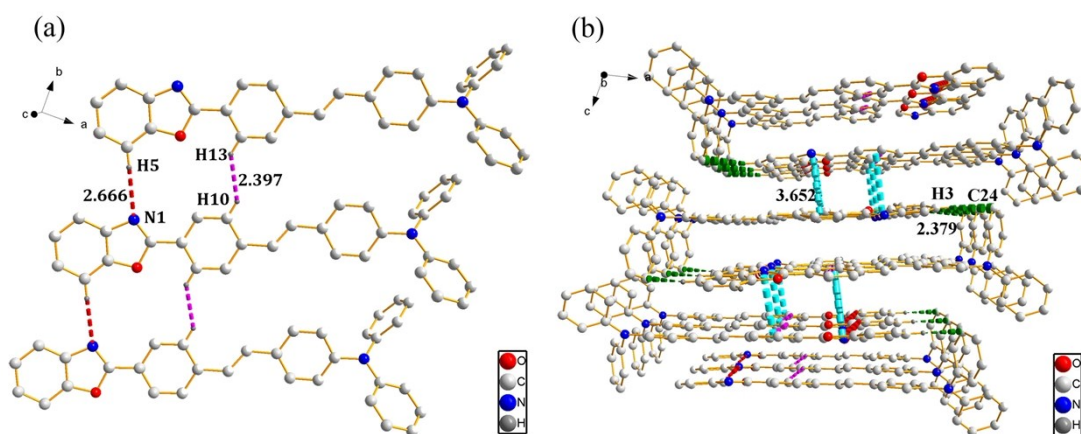

**Fig. S8.** (a) One-dimensional structure of **T3** showing the C-H...N (red), C-H...H-C (red violet) along the b-axis; (b) Two-dimensional structure of **T3** showing the C-H... $\pi$  (green),  $\pi$ ... $\pi$  (blue-green), stacking along the c-axis. Hydrogen atoms except H5, H10, H13 and H3 are omitted for clarity.



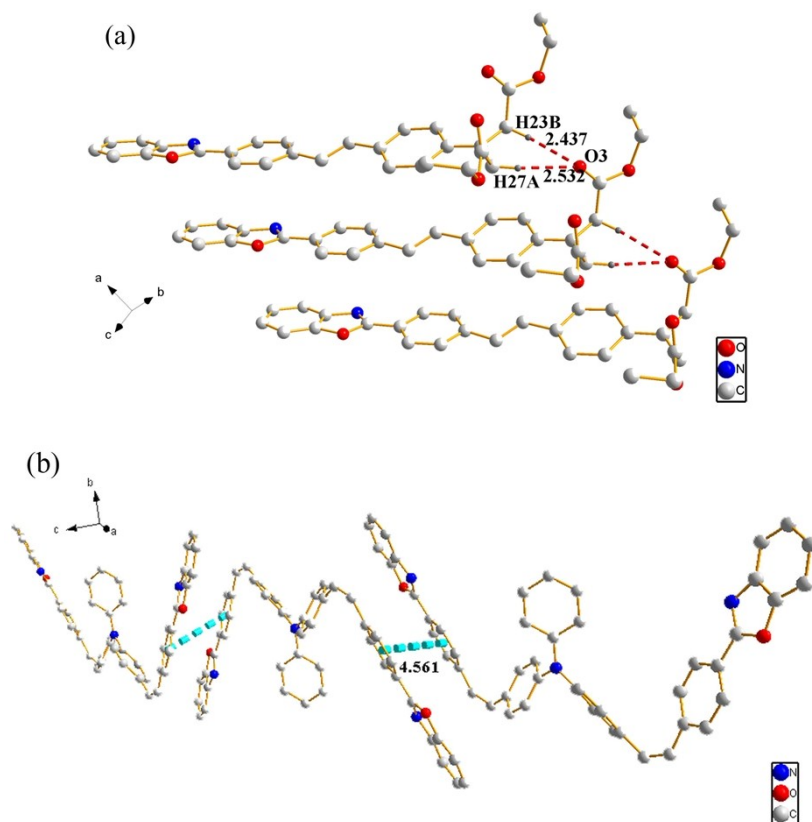

**Fig. S9.** (a) One-dimensional structure of **T1** showing the C-H $\cdots$ O (red) along the a-axis; (b) One-dimensional structure of **T4** showing the  $\pi\cdots\pi$  (blue-green) along the a-axis. Hydrogen atoms except H23B and H27A are omitted for clarity.

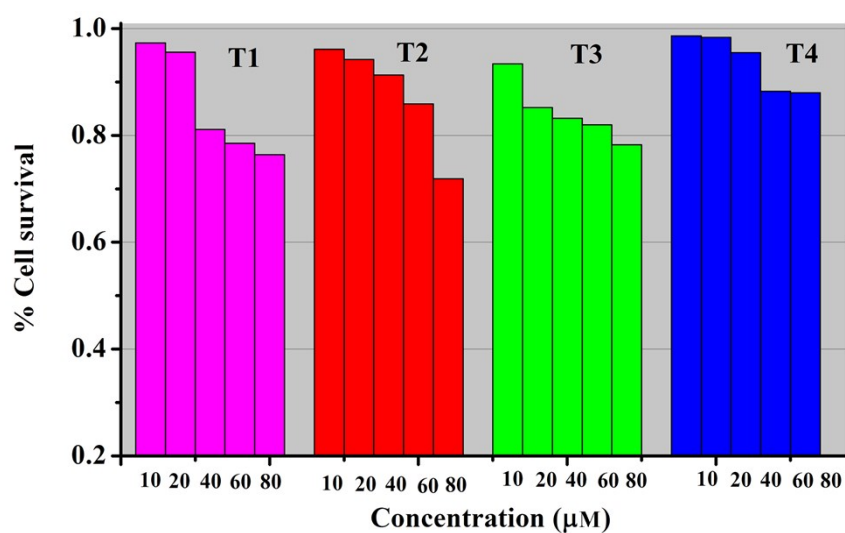

**Figure S10.** MTT assay of HepG2 cells treated with compounds **T1-4** at different concentrations for 24 h.

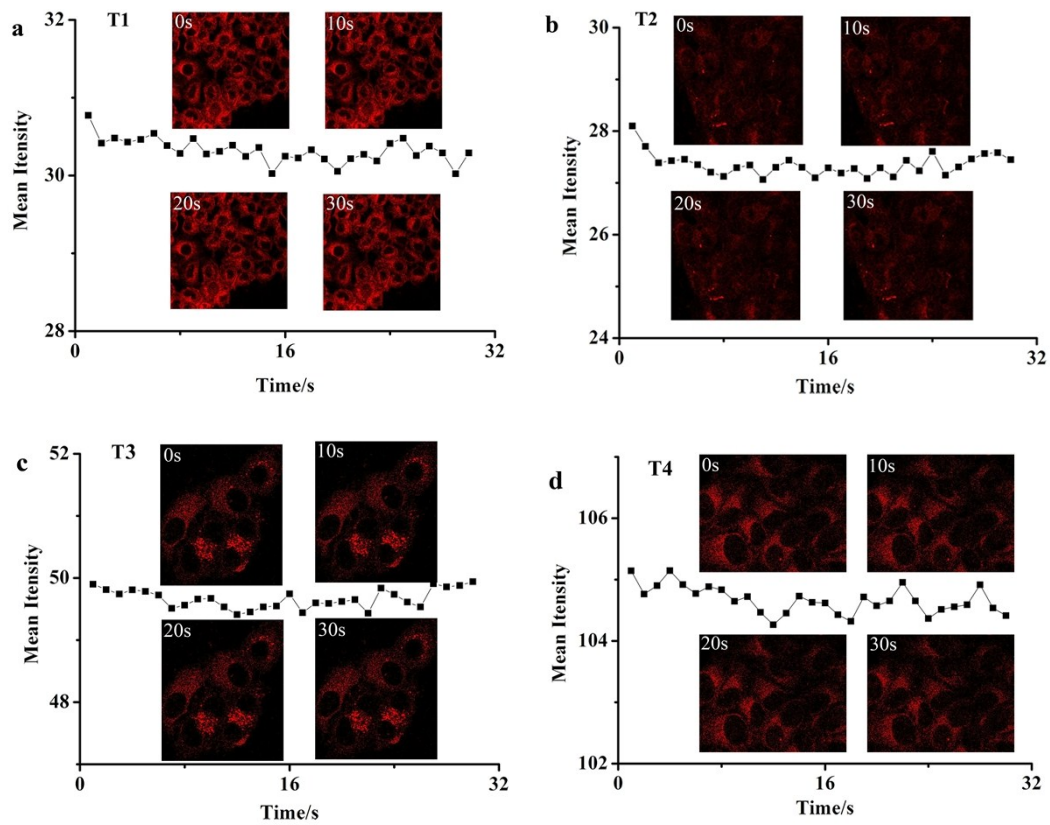

**Figure S11.** Time series showing luminescence intensity of **T1-4** in a HepG2 cytosol region ( $30\mu\text{M}$ , 30 min) under laser exposure over 30s, inset images from time point 0, 10, 20 and 30s.

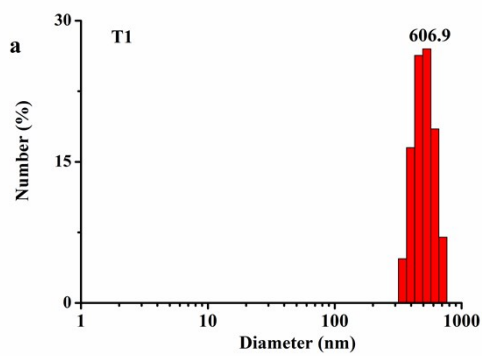

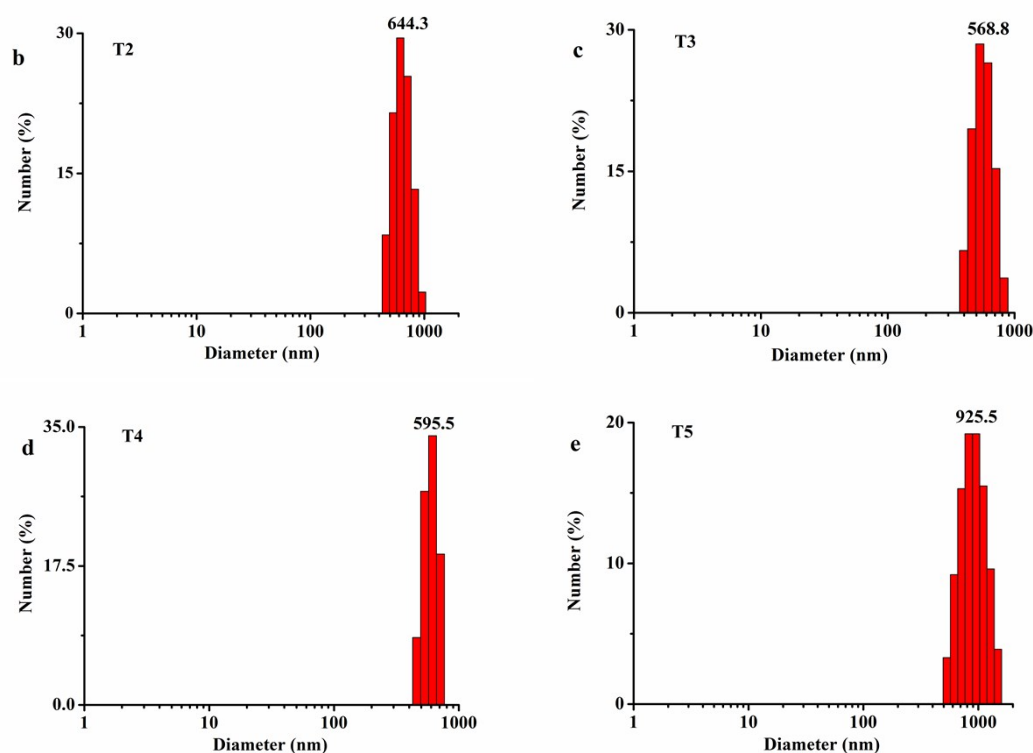

**Figure S12.**(a)-(e) Particle size distributions of **T1-5** in water/DMF (v/v=99:1).

**Table S1**

Photophysical data of **T1-5** in different solvents.

| Compounds | Solvents         | $\lambda_{\max}^{[a]}$ | $\lambda_{\max}^{[b]}$ | $\Phi^{[c]}$ | $\Delta\nu^{[d]}$ | $\lambda_{\max}^{[e]}$ | $\lambda_{\max}^{[f]}$ | $\sigma^{[g]}$<br>(GM) | $\sigma_{\text{eff}}^{[h]}$<br>(GM) | $\tau^{[i]}$ |
|-----------|------------------|------------------------|------------------------|--------------|-------------------|------------------------|------------------------|------------------------|-------------------------------------|--------------|
| <b>T1</b> | Benzene          | 374                    | 445                    | 0.10         | 4266              |                        |                        |                        |                                     | 0.54         |
|           | DCM              | 370                    | 478                    | 0.11         | 6107              |                        |                        |                        |                                     | 0.73         |
|           | THF              | 373                    | 483                    | 0.12         | 6106              |                        |                        |                        |                                     | 0.76         |
|           | Ethyl acetate    | 373                    | 484                    | 0.10         | 6148              |                        |                        |                        |                                     | 0.69         |
|           | DMF              | 380                    | 517                    | 0.21         | 6836              | 840                    | 572                    | 328                    | 68                                  | 1.25         |
|           | DMSO             | 387                    | 520                    | 0.21         | 6879              |                        |                        |                        |                                     | 1.46         |
|           | H <sub>2</sub> O | 372                    | 512                    | 0.04         | 7350              |                        |                        |                        |                                     | 1.00         |
| <b>T2</b> | Benzene          | 400                    | 472                    | 0.13         | 3814              |                        |                        |                        |                                     | 0.61         |
|           | DCM              | 398                    | 516                    | 0.22         | 5746              |                        |                        |                        |                                     | 1.06         |
|           | THF              | 398                    | 500                    | 0.21         | 5126              |                        |                        |                        |                                     | 0.93         |
|           | Ethyl acetate    | 395                    | 495                    | 0.18         | 5114              |                        |                        |                        |                                     | 0.91         |
|           | DMF              | 400                    | 527                    | 0.36         | 6025              | 840                    | 573                    | 369                    | 134                                 | 1.73         |
|           | DMSO             | 402                    | 530                    | 0.53         | 6008              |                        |                        |                        |                                     | 1.97         |

|           |                  |     |     |      |      |     |     |      |     |      |
|-----------|------------------|-----|-----|------|------|-----|-----|------|-----|------|
| <b>T3</b> | H <sub>2</sub> O | 380 | 525 | 0.02 | 7268 |     |     |      |     | 0.82 |
|           | Benzene          | 401 | 487 | 0.55 | 4404 |     |     |      |     | 1.44 |
|           | DCM              | 407 | 520 | 0.55 | 5339 |     |     |      |     | 2.04 |
|           | THF              | 397 | 514 | 0.56 | 5734 |     |     |      |     | 1.84 |
|           | Ethyl acetate    | 395 | 508 | 0.48 | 5631 |     |     |      |     | 1.78 |
|           | DMF              | 412 | 543 | 0.57 | 5856 | 840 | 564 | 694  | 356 | 2.41 |
| <b>T4</b> | DMSO             | 420 | 552 | 0.55 | 5694 |     |     |      |     | 2.53 |
|           | H <sub>2</sub> O | 379 | 513 | 0.06 | 6892 |     |     |      |     | 0.94 |
|           | Benzene          | 415 | 481 | 0.64 | 3306 |     |     |      |     | 1.44 |
|           | DCM              | 419 | 518 | 0.54 | 4561 |     |     |      |     | 2.20 |
|           | THF              | 416 | 507 | 0.58 | 4315 |     |     |      |     | 1.96 |
|           | Ethyl acetate    | 412 | 507 | 0.54 | 4548 |     |     |      |     | 1.88 |
| <b>T5</b> | DMF              | 422 | 530 | 0.19 | 4829 | 800 | 574 | 1214 | 232 | 1.24 |
|           | DMSO             | 423 | 539 | 0.15 | 5088 |     |     |      |     | 1.07 |
|           | H <sub>2</sub> O | 430 | 520 | 0.04 | 4025 |     |     |      |     | 0.49 |
|           | Benzene          | 425 | 486 | 0.63 | 2953 |     |     |      |     | 1.57 |
|           | DCM              | 423 | 524 | 0.46 | 4557 |     |     |      |     | 2.32 |
|           | THF              | 423 | 514 | 0.53 | 4185 |     |     |      |     | 2.07 |
| <b>T5</b> | Ethyl acetate    | 420 | 514 | 0.49 | 4354 |     |     |      |     | 2.03 |
|           | DMF              | 431 | 545 | 0.26 | 4853 | 740 | 581 | 2702 | 712 | 1.85 |
|           | DMSO             | 430 | 558 | 0.21 | 5335 |     |     |      |     | 1.72 |
|           | H <sub>2</sub> O | 427 | 529 | 0.04 | 4516 |     |     |      |     | 0.48 |

<sup>[a]</sup> Absorption peak position nm ( $c = 1.0 \times 10^{-5}$  mol L<sup>-1</sup>, nm), <sup>[b]</sup> Peak position of OPEF ( $c = 1.0 \times 10^{-5}$  mol L<sup>-1</sup>, nm), excited at the absorption maximum, <sup>[c]</sup> Quantum yields determined by using fluorescein ( $c = 1.0 \times 10^{-5}$  mol L<sup>-1</sup>) as the standard, <sup>[d]</sup> Stocks' shift in cm<sup>-1</sup>, <sup>[e]</sup> Maximum two-photon excitation wavelength ( $5 \times 10^{-4}$  mol L<sup>-1</sup>, nm). <sup>[f]</sup> TPEF peak position in nm pumped by femtosecond laser pulses at 500 mw at their maximum excitation wavelength. <sup>[g]</sup> 2PA cross section, <sup>[h]</sup> Effective 2PA cross section, <sup>[i]</sup> Fluorescence lifetime (ns).

**Table S2**

Crystal data of compounds **T1**, **T2**, **T3** and **T4**.

| Compounds         | <b>T1</b>                                       | <b>T2</b>                                        | <b>T3</b>                                        | <b>T4</b>                                              |
|-------------------|-------------------------------------------------|--------------------------------------------------|--------------------------------------------------|--------------------------------------------------------|
| Empirical formula | C <sub>30</sub> H <sub>29</sub> NO <sub>5</sub> | C <sub>25</sub> H <sub>24</sub> N <sub>2</sub> O | C <sub>33</sub> H <sub>24</sub> N <sub>2</sub> O | C <sub>24</sub> H <sub>16.50</sub> N <sub>1.50</sub> O |
| Formula weight    | 483.54                                          | 368.46                                           | 464.54                                           | 341.89                                                 |

|                                          |            |               |             |            |
|------------------------------------------|------------|---------------|-------------|------------|
| Crystal system                           | Triclinic  | Orthorhombic  | Monoclinic  | Monoclinic |
| Space group                              | P-1        | P2(1)2(1)2(1) | C2/c        | C2/c       |
| a[Å]                                     | 5.0966(11) | 7.589(2)      | 53.673(5)   | 22.153(3)  |
| b[Å]                                     | 12.219(3)  | 9.368(3)      | 6.554(6)    | 9.690(14)  |
| c[Å]                                     | 20.093(4)  | 28.167(8)     | 14.323(14)  | 17.251(3)  |
| $\alpha$ [°]                             | 96.803(3)  | 90.000        | 90.000      | 90.000     |
| $\beta$ [°]                              | 96.243(3)  | 90.000        | 103.843(10) | 95.937(2)  |
| $\gamma$ [°]                             | 97.956(3)  | 90.000        | 90.000      | 90.000     |
| $V$ [Å <sup>3</sup> ]                    | 1220.5(4)  | 2002.5 (10)   | 4891.9 (8)  | 3683.2(9)  |
| Z                                        | 2          | 4             | 8           | 8          |
| $T$ [K]                                  | 296(2)     | 296(2)        | 296(2)      | 296(2)     |
| $D_{\text{calcd}}$ [g·cm <sup>-3</sup> ] | 1.316      | 1.222         | 1.262       | 1.233      |
| F(000)                                   | 512        | 784           | 1952        | 1432       |
| $\mu$ [mm <sup>-1</sup> ]                | 0.089      | 0.075         | 0.076       | 0.063      |
| $\theta$ range[°]                        | 1.03-25.68 | 2.29-25.00    | 0.78-25.00  | 1.85-25.68 |
| Total no. data                           | 4539       | 14162         | 16661       | 12667      |
| No. unique data                          | 1963       | 3519          | 4295        | 3242       |
| $R_{\text{int}}$                         | 0.0838     | 0.0531        | 0.0355      | 0.0267     |
| $R_1$                                    | 0.1781     | 0.1291        | 0.0770      | 0.0454     |
| $wR_2$                                   | 0.2072     | 0.2426        | 0.1484      | 0.1330     |
| GOF                                      | 1.199      | 1.048         | 1.043       | 1.031      |

---
